# Supplementary material
Source: PubMed Central journal article supplement (PMC4456626)
Supplement: cr201559x5.pdf [file cr201559x5.pdf]

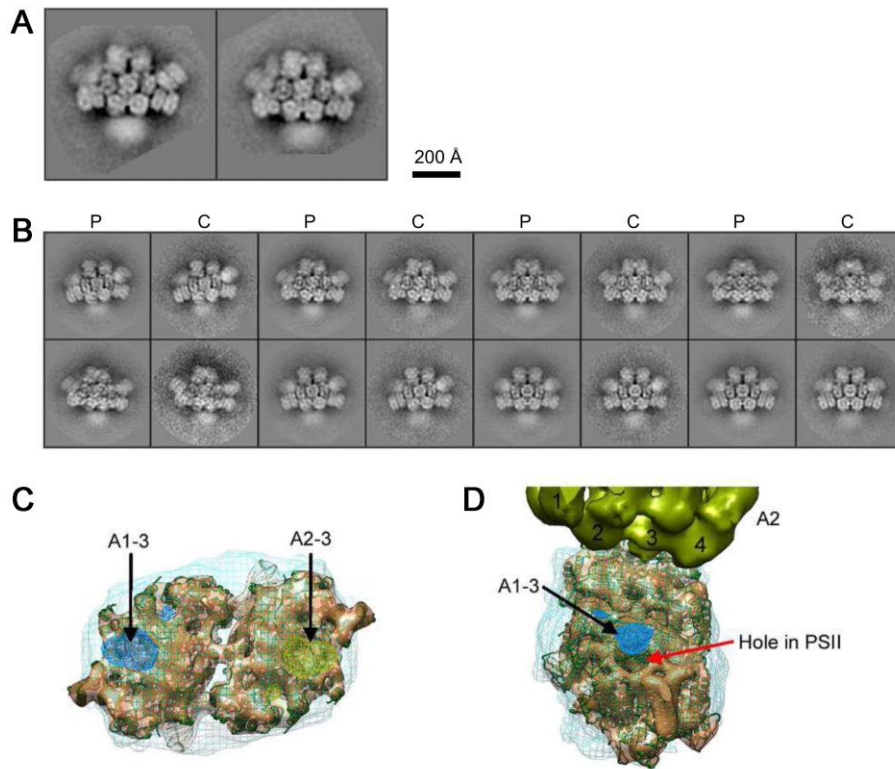

**Fig. S5. Association of PSII to the PBS.**

(A) Typical 2D averages of the PBS-PSII complex.

(B) Matching pairs between projections (odd lines) and class averages (even lines) in the last iteration of the reconstruction.

(C,D) Connection of PSII and the PBS. Density map of PSII is shown in cyan mesh. Crystal structure of PSII<sup>5</sup> and its transformed 20 Å resolution map (in pink surface) are shown. Protrusions of disc 3 (indicated by arrows) orient to the holes in PSII.
