# Supplementary material
Source: PubMed Central journal article supplement (PMC4456626)
Supplement: cr201559x6.pdf [file cr201559x6.pdf]

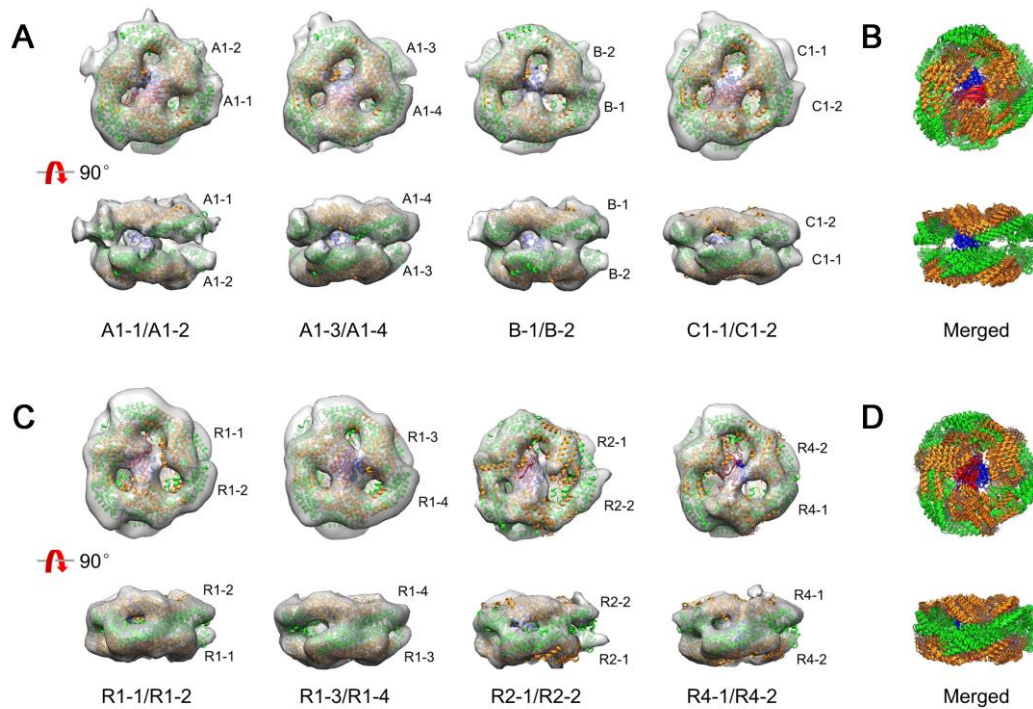

**Fig. S6. Comparison of hexamers.**

(A) Comparison of APC hexamers from the core. The four APC hexamers from the core are aligned by the segmented density maps.

(B) The docked crystal structures of APC hexamers are merged, showing similar organisation for all APC hexamer.

(C) Comparison of PC hexamers from the rods. Four PC hexamers from the rods are aligned by the segmented density maps.

(D) The docked crystal structures of PC hexamers are merged, showing similar organisation for PC hexamer.
