# Supplementary material
Source: PubMed Central journal article supplement (PMC4456626)
Supplement: cr201559x7.pdf [file cr201559x7.pdf]

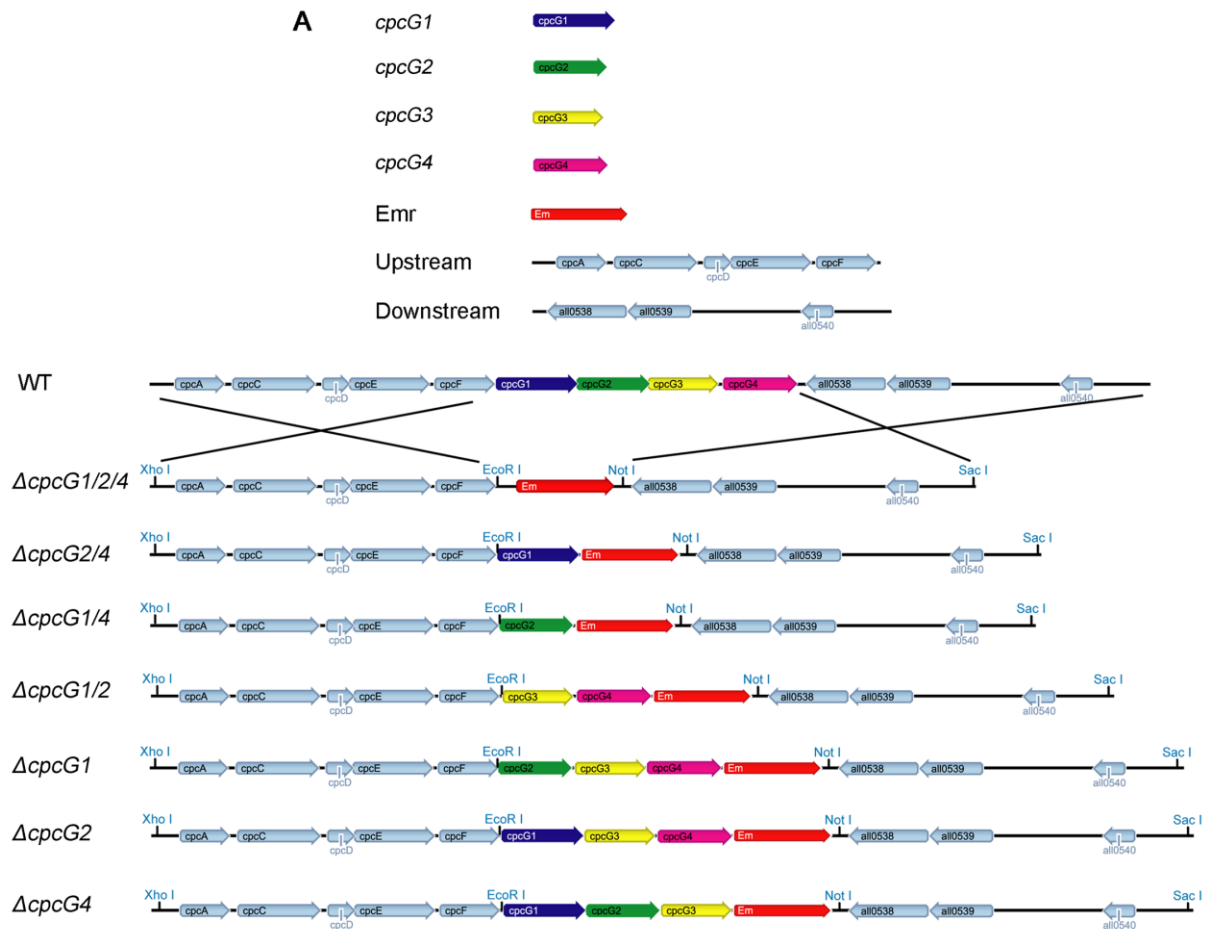

**Fig. S7. Molecular reconstitution and purification of LRC mutated PBSs.**

(A) Construction of PBS mutants. Genes of *cpcG1-4* and erythromycin resistance (Emr), the upstream and downstream homologous fragments flanking the genes are shown at the top. Mutants were constructed by recombination between the homologous fragments of every mutant and wild-type locus. Mutant fragments digested by *Xho I* and *Sac I* were cloned into plasmid pRL-277 for DNA transformation.

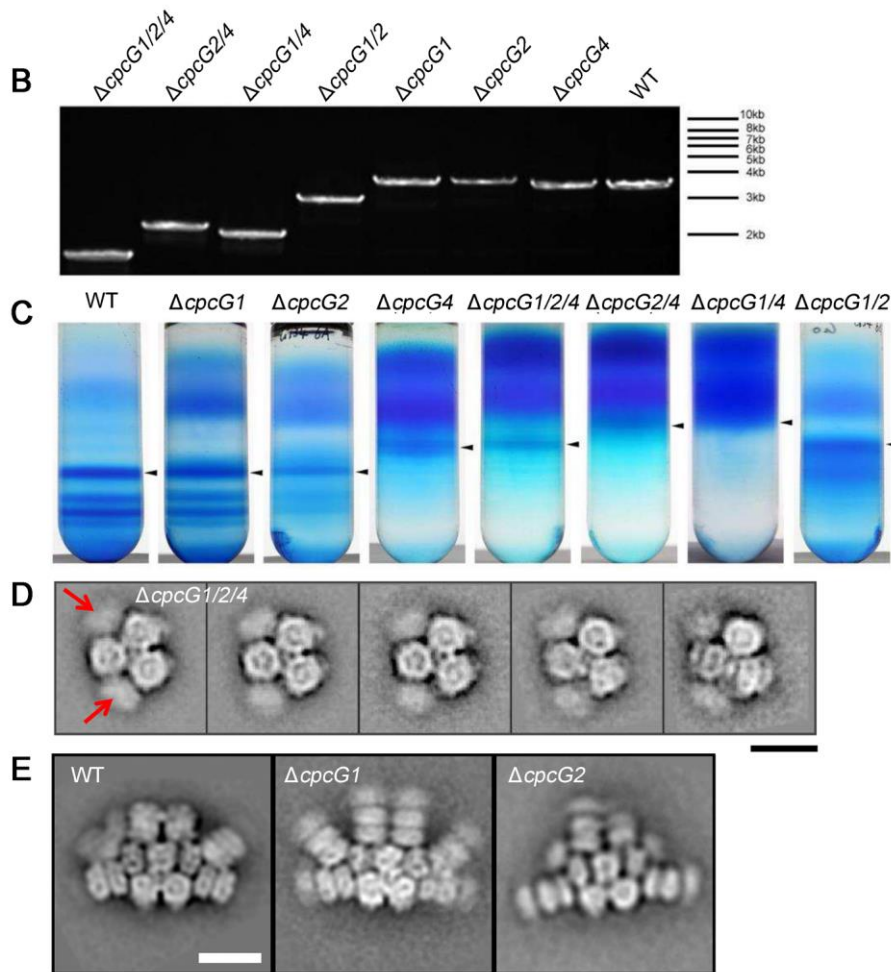

**(B)** PCR experiments verifying the mutant reconstructions. The lengths of these PCR products are as follows:  $\Delta cpcG1/2/4$ -1163bp,  $\Delta cpcG2/4$ -2169bp,  $\Delta cpcG1/4$ -2033bp,  $\Delta cpcG1/2$ -3020bp,  $\Delta cpcG1$ -3800bp,  $\Delta cpcG2$ -3889bp,  $\Delta cpcG4$ -3656bp, WT-3559bp.

**(C)** Isolation of PBSs from *cpcG1-4* mutant strains by sucrose density gradient centrifugation. Arrows indicate the samples used for EM analysis.

**(D)** Reference free 2D classification of isolated cores from  $\Delta cpcG1/2/4$  sample. The result indicates that without surrounding rods, the C1/C2 cylinders are flexible (indicated by arrows for the first image). Scale bar 20 nm.

**(E)** Comparison of 2D average of wild-type PBS (WT) and  $\Delta cpcG1$  and  $\Delta cpcG2$  mutants. Scale bar 20 nm.
