# Supplementary material
Source: PubMed Central journal article supplement (PMC4456626)
Supplement: cr201559x10.pdf [file cr201559x10.pdf]

**Table S1.** Cross-correlation coefficient (CCC) of crystal structures and the EM density map.

CCC values were calculated using 'fit in map' program in Chimera.

| Discs         | CCC   | CCC(use only data above contour level) |
|---------------|-------|----------------------------------------|
| A1-1(A2-1)    | 0.851 | 0.910                                  |
| A1-2(A2-2)    | 0.826 | 0.886                                  |
| A1-3(A2-3)    | 0.838 | 0.877                                  |
| A1-4(A2-4)    | 0.847 | 0.902                                  |
| B-1(B'-1)     | 0.811 | 0.881                                  |
| B-2(B'-2)     | 0.781 | 0.841                                  |
| C1-1(C2-1)    | 0.737 | 0.792                                  |
| C1-2(C2-2)    | 0.761 | 0.824                                  |
| Rb-1(Rb'-1)   | 0.786 | 0.855                                  |
| Rb-2(Rb'-2)   | 0.805 | 0.872                                  |
| Rb-3(Rb'-3)   | 0.865 | 0.918                                  |
| Rb-4(Rb'-4)   | 0.858 | 0.932                                  |
| Rs1-1(Rs1'-1) | 0.847 | 0.93                                   |
| Rs1-2(Rs1'-2) | 0.912 | 0.959                                  |
| Rs1-3(Rs1'-3) | 0.914 | 0.959                                  |
| Rs1-4(Rs1'-4) | 0.846 | 0.943                                  |
| Rs2-1(Rs2'-1) | 0.686 | 0.562                                  |
| Rs2-2(Rs2'-2) | 0.713 | 0.605                                  |
| Rt-1(Rt'-1)   | 0.822 | 0.836                                  |
| Rt-2(Rt'-2)   | 0.809 | 0.786                                  |
| Rt-3(Rt'-3)   | 0.825 | 0.809                                  |
| Rt-4(Rt'-4)   | 0.779 | 0.810                                  |
| PSII          | 0.624 | 0.609                                  |
