# Supplementary material
Source: PubMed Central journal article supplement (PMC4456626)
Supplement: cr201559x11.pdf [file cr201559x11.pdf]

**Table S2.** Primers used in this study.

| <b>Primers</b> | <b>Sequence</b>                                                   |
|----------------|-------------------------------------------------------------------|
| PN-up          | 5'- TTA <del>CT</del> CGAGACTACCTACGCATCATCACCTA -3'              |
| PC-up          | 5'- CAGGAATTC <del>AACT</del> ATTGACTTTGAGCCAATAG -3'             |
| PN-down        | 5'- ACTGCGGCCGCTAACATTGGGTGGAGA -3'                               |
| PC-down        | 5'- TACGAGCTCAGCAGTCTGCACATAC -3'                                 |
| PN-G1          | 5'- CGGGAATTCAGTTTCATAAGAAAAGGTGAAAG -3'                          |
| PC-G1          | 5'- CAGACTAGTAGTTGTCAGTTGTCAGTCAACAG -3'                          |
| PN-G2          | 5'- GTAGAATTCCTGTTGACTGACA <del>ACT</del> GACA <del>ACT</del> -3' |
| PC-G2          | 5'- GCGACTAGTGAAGTAGGTCGGCAACTTA -3'                              |
| PN-G3E         | 5'- GCGGAATTC <del>TAAG</del> TTGCCGACCTACTTC -3'                 |
| PN-G3X         | 5'- GCGTCTAGATAAGTTGCCGACCTACTTC -3'                              |
| PC-G3          | 5'- ACAACTAGTCCGCATTAGGTT <del>CAGA</del> AGCTA -3'               |
| PN-G4E         | 5'- GTGGAATTCAGTAAAGCATGAAGGAGGAT -3'                             |
| PN-G4X         | 5'- GTGTCTAGAAGTAAAGCATGAAGGAGGAT -3'                             |
| PC-G4          | 5'- GTCACTAGTAAAAACA <del>ACT</del> GGGTCTAGTCTC -3'              |
| PN-EmS         | 5'- TCAACTAGTGCGTGCTATAATTATACTA -3'                              |
| PN-EmE         | 5'- CGAGAATTCATCGAATAAATACCTGTGA -3'                              |
| PC-Em          | 5'- TATGCGGCCGCTGAGTGAGCTGATACC -3'                               |
| PN-Fup         | 5'- CGCGAGATCTGATTACCTGGGAATAGC -3'                               |
| PC-Fup         | 5'- TATAGGATCCAATTTGGTTGCACTACG -3'                               |
| PN-Fdown       | 5'- TATAGTCGACAATTAAGCGAGCGGGAT -3'                               |
| PC-Fdown       | 5'- CACACTCGAGAGGACTTAGCAGAGGTT -3'                               |

## Supplemental References:

- 1 Kelley LA, Sternberg MJ. Protein structure prediction on the Web: a case study using the Phyre server. *Nature protocols* 2009; **4**:363-371.
- 2 Reuter W, Wiegand G, Huber R, Than ME. Structural analysis at 2.2 Å of orthorhombic crystals presents the asymmetry of the allophycocyanin-linker complex, APLC7.8, from phycobilisomes of *Mastigocladus laminosus*. *Proceedings of the National Academy of Sciences of the United States of America* 1999; **96**:1363-1368.
- 3 Nield J, Rizkallah PJ, Barber J, Chayen NE. The 1.45 Å three-dimensional structure of C-phycocyanin from the thermophilic cyanobacterium *Synechococcus elongatus*. *Journal of structural biology* 2003; **141**:149-155.
- 4 Gao X, Zhang N, Wei TD *et al.* Crystal structure of the N-terminal domain of linker L(R) and the assembly of cyanobacterial phycobilisome rods. *Molecular microbiology* 2011; **82**:698-705.
- 5 Umena Y, Kawakami K, Shen JR, Kamiya N. Crystal structure of oxygen-evolving photosystem II at a resolution of 1.9 Å. *Nature* 2011; **473**:55-60.
